# Supplementary material for: Differentiation status of primary chronic myeloid leukemia cells affects sensitivity to BCR-ABL1 inhibitors
Source: PubMed Central journal article supplement (PMC5410248; doi:10.18632/oncotarget.15146), 2017-02-07
Supplement: oncotarget-08-22606-s001.pdf [file oncotarget-08-22606-s001.pdf]

## Differentiation status of primary chronic myeloid leukemia cells affects sensitivity to BCR-ABL1 inhibitors

### Supplementary Materials

**Supplementary Table 1: Baseline characteristics and response data of Cohort 1 (Helsinki).**  
See Supplementary\_Table\_1

**Supplementary Table 2: DSRT drug library.** See Supplementary\_Table\_2

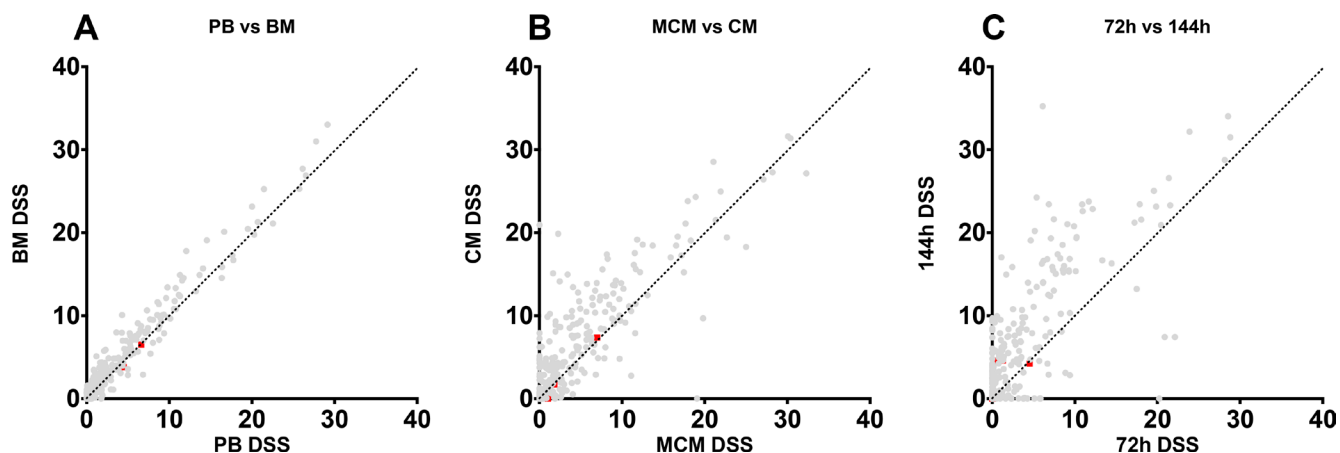

**Supplementary Figure 1: Drug sensitivity scores (DSS) of primary CP CML mononuclear cell (MNC) samples from Cohort 1 in different testing conditions.** (A) Comparison of DSS averages of peripheral blood (PB,  $n = 15$ ) and bone marrow (BM,  $n = 10$ ) samples. (B) Comparison of DSS averages of CP CML MNC samples ( $n = 2$ ) tested in different media. (C) Comparison of DSS change in one sample tested with 72 h and 144 h incubation. TKI responses are highlighted as red colored squares. MCM, Mononuclear Cell Medium; CM, conditioned medium.

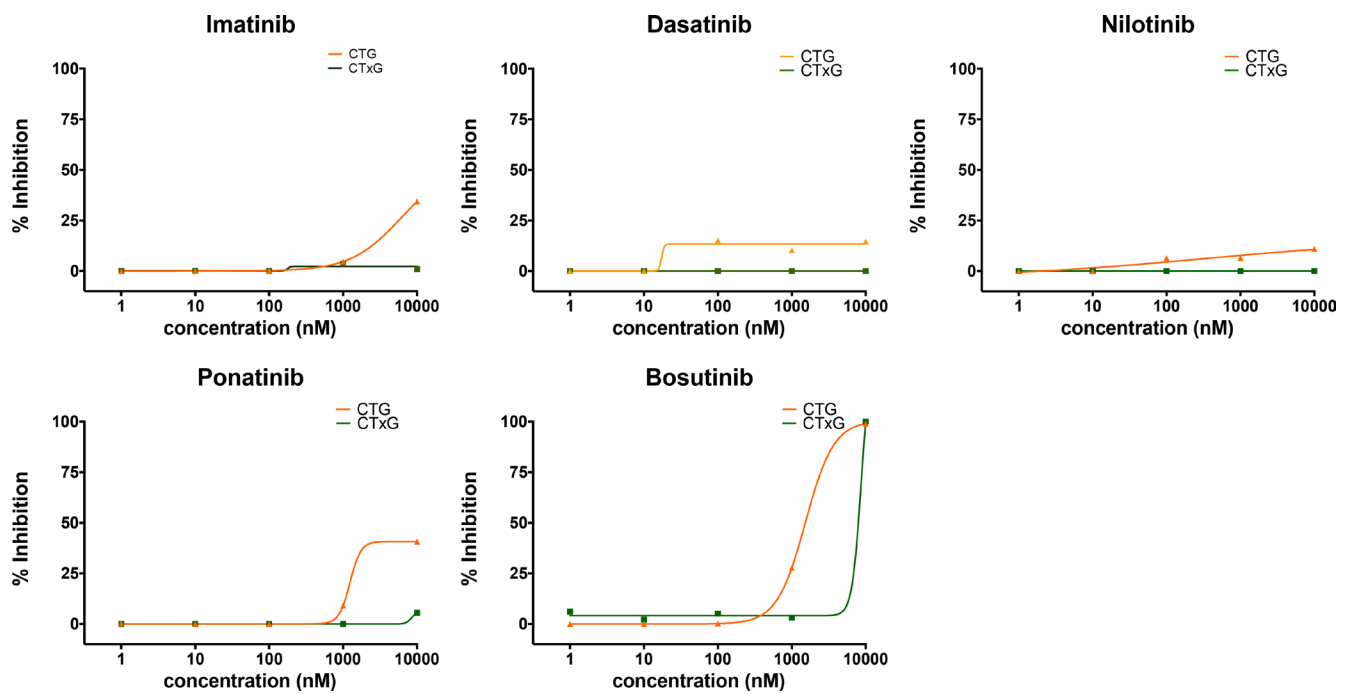

Supplementary Figure 2: Comparison of TKI responses in CP CML MNC with ATP measuring CellTiter-Glo (CTG) and cell cytotoxicity measuring CellTox Green (CTxG) viability assay.

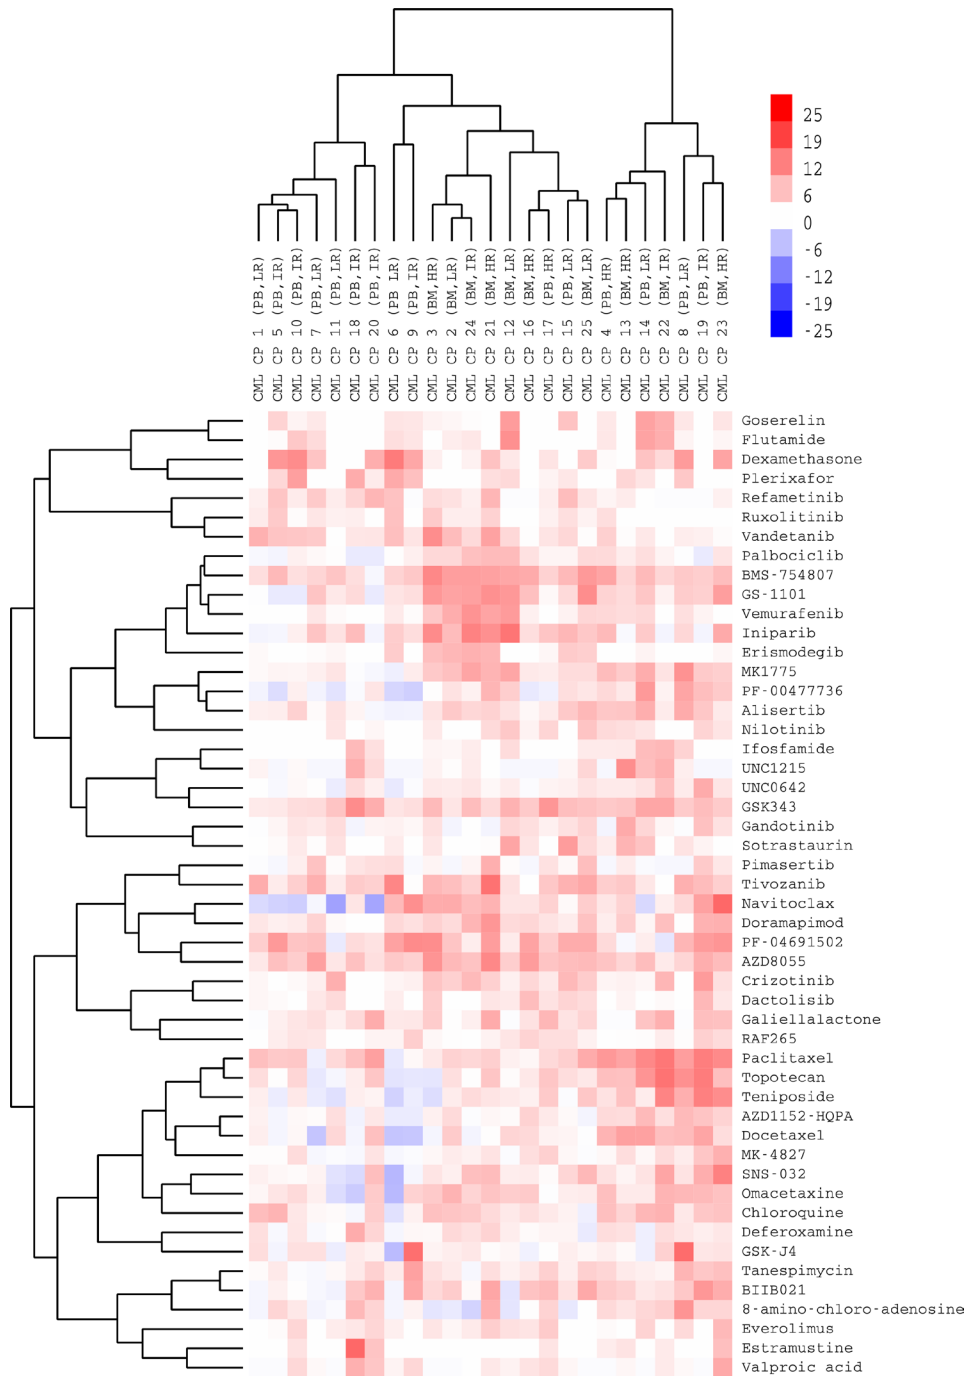

**Supplementary Figure 3: Clustering analysis of CP CML samples from Cohort 1 using 50 most sensitive drugs from *ex vivo* drug testing.** Color denotes drug sensitivity (red: sensitive, white: neutral, blue: insensitive). Samples were also annotated by Sokal score (low risk: LR, intermediate risk: IR or high risk: HR) and sample source (peripheral blood: PB or bone marrow: BM).

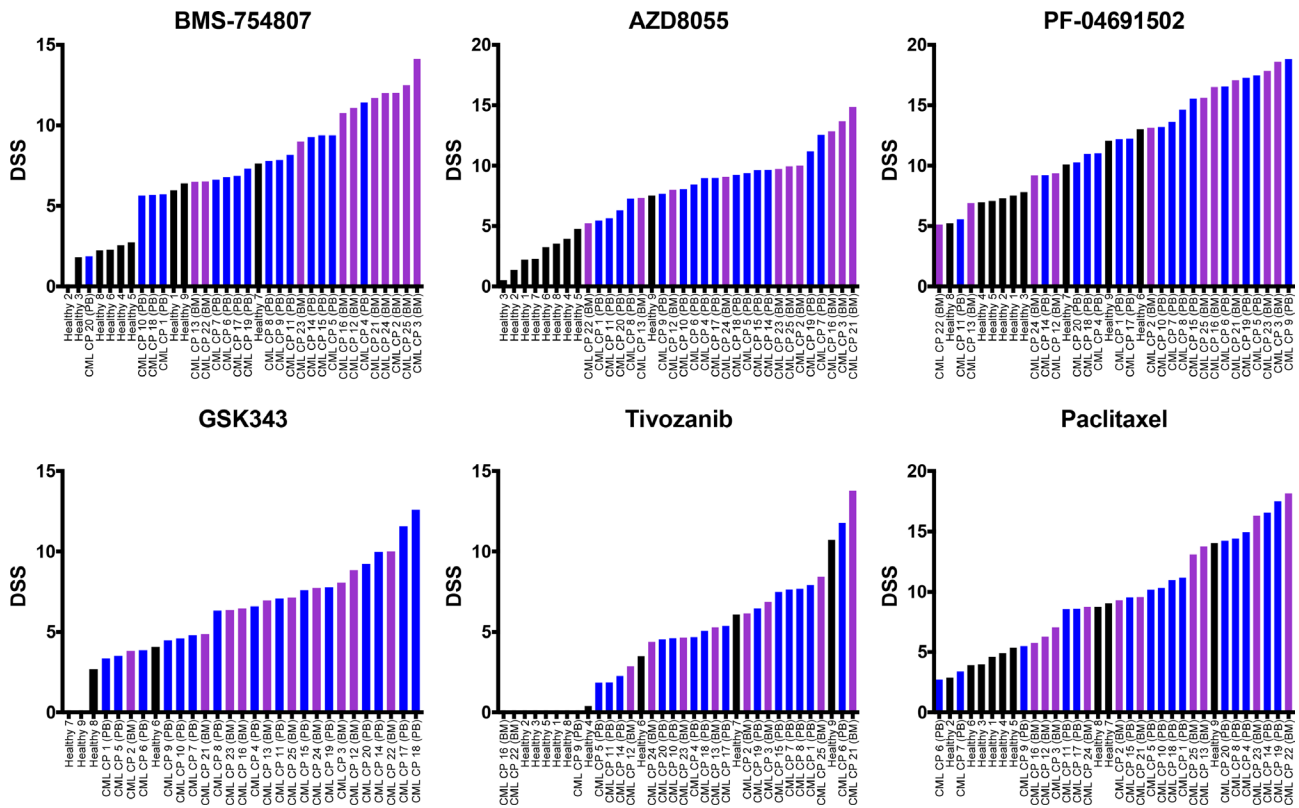

Supplementary Figure 4: Drug sensitivity scores (DSS) of the six sensitive drugs in all CP CML samples studied in Cohort 1. Healthy controls (black), peripheral blood (PB, blue) and bone marrow (BM, purple).

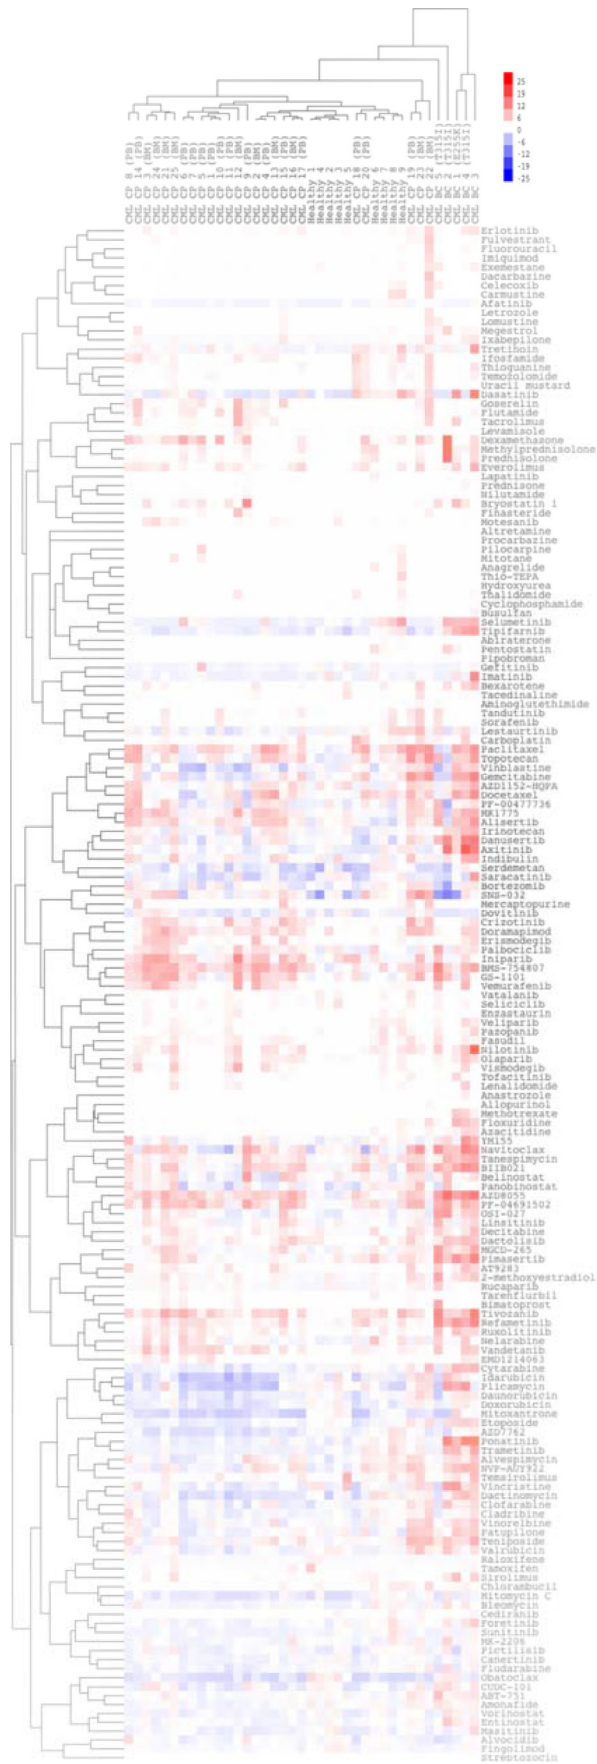

**Supplementary Figure 5: Clustering analysis of drug sensitivities in chronic myeloid leukemia chronic phase (CP CML), blast crisis (BC CML) and healthy bone marrow controls.** Drugs that were not tested in all samples or showed no activity in any sample were omitted from analysis. Color denotes drug sensitivity (red: sensitive, white: neutral, blue: insensitive). Samples were also annotated by sample type (peripheral blood: PB or bone marrow: BM).
